# Supplementary material for: The Paracrine Effect of Adipose-Derived Stem Cells Orchestrates Competition between Different Damaged Dermal Fibroblasts to Repair UVB-Induced Skin Aging
Source: Hindawi journal article supplement (doi:10.1155/2020/8878370), 2020-12-17
Supplement: f1 [file 8878370.f1.pdf]

**A**

| Gene           |         | Primer sequence          | Accession No.  |
|----------------|---------|--------------------------|----------------|
| Nrf2           | Forward | TCAGCGACGGAAAGAGTATGA    | NM_001145412.3 |
|                | Reverse | CCACTGGTTTCTGACTGGATGT   |                |
| IL-6           | Forward | ACTCACCTCTTCAGAACGAATTG  | NM_000600.5    |
|                | Reverse | CCATCTTTGGAAGGTTTCAGGTTG |                |
| MMP-1          | Forward | AAAATTACACGCCAGATTGCC    | NM_001145938.2 |
|                | Reverse | GGTGTGACATTACTCCAGAGTTG  |                |
| TGF- $\beta$ 1 | Forward | GGCCAGATCCTGTCCAAGC      | NM_000660.7    |
|                | Reverse | GTGGGTTTCCACCATTAGCAC    |                |
| EGF            | Forward | TGGATGTGCTTGATAAGCGG     | NM_001178130.3 |
|                | Reverse | ACCATGTCCTTTCCAGTGTGT    |                |
| IGF-1          | Forward | GCTCTTCAGTTCGTGTGTGGA    | NM_000618.5    |
|                | Reverse | GCCTCCTTAGATCACAGCTCC    |                |
| $\beta$ -actin | Forward | TCCTCCTGAGCGCAAGTACTCC   | NM_001101.5    |
|                | Reverse | CATACTCCTGCTTGCTGATCCAC  |                |

**B**

| Gene           |         | Primer sequence        | Accession No.  |
|----------------|---------|------------------------|----------------|
| Nrf2           | Forward | ACTCAAATCCCACCTTAAACAC | NM_010902.4    |
|                | Reverse | GTCACAGCCTTCAATAGTCCC  |                |
| IL-6           | Forward | GACTGATGCTGGTGACAACC   | NM_001314054.1 |
|                | Reverse | AGACAGGTCTGTTGGGAGTG   |                |
| MMP-1          | Forward | AGGTTGAGGCTGAGCTCTTT   | NM_008607.2    |
|                | Reverse | AAGGTCACGGGATGGATGTT   |                |
| TGF- $\beta$ 1 | Forward | TTGCTTCAGCTCCACAGAGA   | NM_009371.3    |
|                | Reverse | CAGAAGTTGGCATGGTAGCC   |                |
| EGF            | Forward | AGAAGGCTACGAAGGAGACG   | NM_001310737.1 |
|                | Reverse | AGAGTCAGGGCAACTCAGTC   |                |
| IGF-1          | Forward | CTCTTGGGAGATGCAAAGGC   | NM_001111274.1 |
|                | Reverse | GTGTGACCCAGGTTGCAAAT   |                |
| $\beta$ -actin | Forward | CTCCTGAGCGCAAGTACTCT   | NM_007393.5    |
|                | Reverse | TACTCCTGCTTGCTGATCCAC  |                |

*Supplementary Table 1. Sequences of primers used in qRT-PCR. A. Primers used in humans. B. Primers used in mice.*

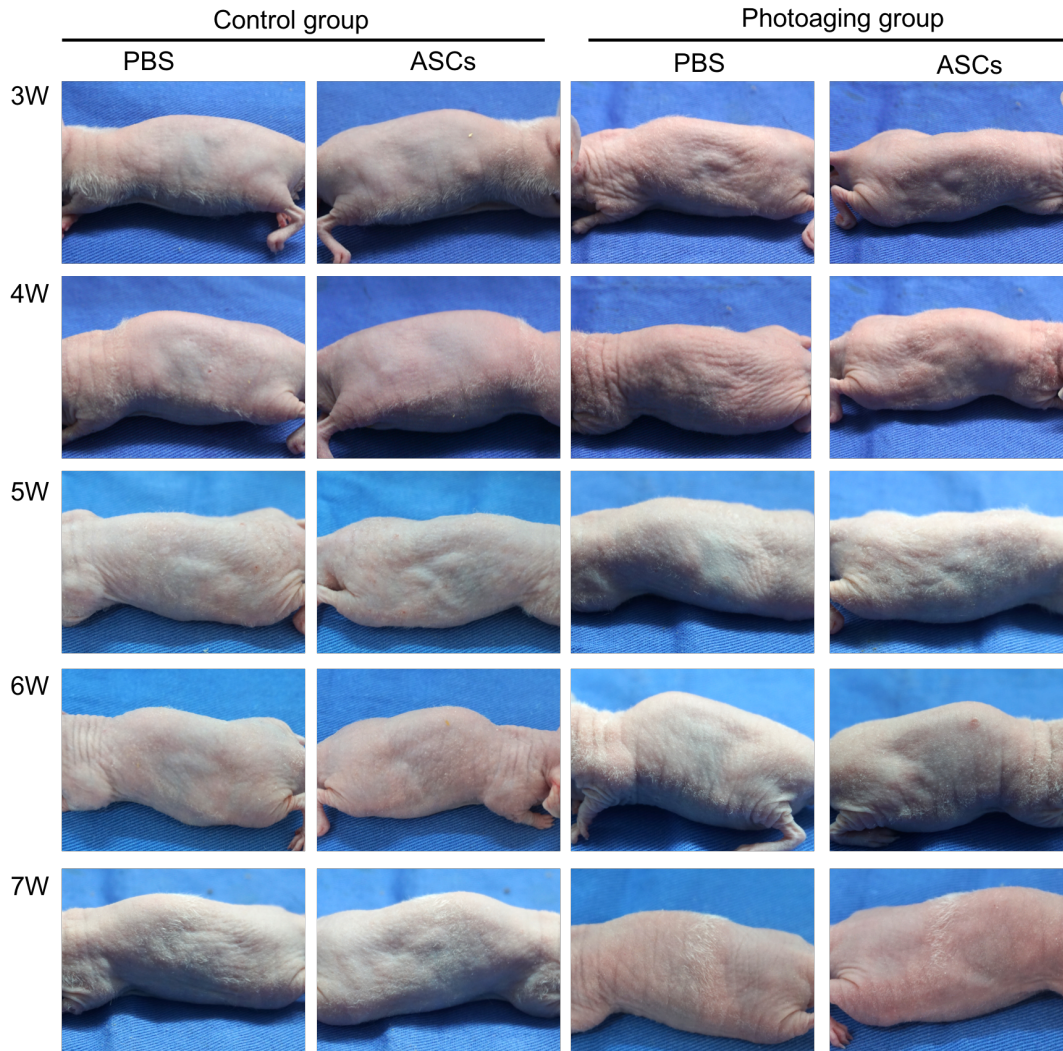

***Supplementary Figure 1. Photographs of skin from mice in the different groups showing wrinkle formation.***
